# Supplementary material for: Molecular Defense Response of Bursaphelenchus xylophilus to the Nematophagous Fungus Arthrobotrys robusta
Source: MDPI journal article supplement (doi:10.3390/cells12040543), 2023-02-08
Supplement: s1 [file s1]

**Table S1.** The primers for RT-qPCR.

| Wormbase ID     | Forward / Reverse | Primer Sequence        |
|-----------------|-------------------|------------------------|
| BXYJ_LOCUS5276  | BXYJ_LOCUS5276qF  | CGCTGGAGTGGTCGTTAAGTTG |
|                 | BXYJ_LOCUS5276qR  | CGCCGACACATCTCACAGTTG  |
| BXYJ_LOCUS12540 | BXYJ_LOCUS12540qF | AGCAACTCCATCTCAGCGAACA |
|                 | BXYJ_LOCUS12540qR | CTCCGTCCGATTGTCCACCAT  |
| BXYJ_LOCUS5668  | BXYJ_LOCUS5668qF  | AAGTATTTCCCGTTGATCGAG  |
|                 | BXYJ_LOCUS5668qR  | TCCCAATTTCTCAGTGTAATCC |
| BXYJ_LOCUS5675  | BXYJ_LOCUS5675qF  | TCCCACCTATGCCGACCTT    |
|                 | BXYJ_LOCUS5675qR  | CTCCACTCTCTTCAGATGCTCC |
| BXYJ_LOCUS2907  | BXYJ_LOCUS2907qF  | TTATACCCGAACAAACAGGTC  |
|                 | BXYJ_LOCUS2907qR  | ATCTTTCCCGTTCAGTCCG    |
| BXYJ_LOCUS15290 | BXYJ_LOCUS15290qF | AGCAATATTTTCCACGCCACA  |
|                 | BXYJ_LOCUS15290qR | AGAGCACAACGGAACACAAT   |
| BXYJ_LOCUS5680  | BXYJ_LOCUS5680qF  | AGAAGCGGCACATATTGACCA  |
|                 | BXYJ_LOCUS5680qR  | TTTTCGTCCTGCGTGAATCCC  |
| BXYJ_LOCUS5679  | BXYJ_LOCUS5679qF  | TCAAAGACACCAGAGTTGCAC  |
|                 | BXYJ_LOCUS5679qR  | TCACACAACGGCTTCCCATC   |

**Table S2.** Statistics analysis of RNA sequencing data.

| Samples | Raw Data    | Clean Data (%)      | Raw Data(bp)   | Q20 (%) | Q30 (%) | GC (%) | Total Mapped (%) |
|---------|-------------|---------------------|----------------|---------|---------|--------|------------------|
| CK_1    | 43,381,914  | 43,316,032 (99.85%) | 6,462,678,400  | 98.16%  | 94.51%  | 47.00% | 93.79%           |
| CK_2    | 44,770,464  | 44,688,496 (99.82%) | 6,674,427,728  | 98.03%  | 94.18%  | 47.22% | 93.94%           |
| T24_1   | 45,583,484  | 45,505,938 (99.83%) | 6,781,176,089  | 98.14%  | 94.52%  | 47.39% | 90.56%           |
| T24_2   | 44,691,628  | 44,612,332 (99.82%) | 6,647,868,122  | 98.05%  | 94.31%  | 47.28% | 92.44%           |
| T30_1   | 42,117,894  | 42,041,160 (99.82%) | 6,271,299,608  | 97.89%  | 93.84%  | 47.07% | 90.63%           |
| T30_2   | 44,120,688  | 44,052,140 (99.84%) | 6,566,560,915  | 98.14%  | 94.50%  | 47.10% | 91.52%           |
| T36_1   | 44,841,800  | 44,757,468 (99.81%) | 6,673,663,935  | 97.86%  | 93.78%  | 47.12% | 90.12%           |
| T36_2   | 46,830,432  | 46,736,896 (99.80%) | 6,972,546,638  | 97.97%  | 94.09%  | 47.17% | 90.49%           |
| Total   | 44,0107,102 | 439,346,946         | 65,522,186,643 |         |         |        |                  |

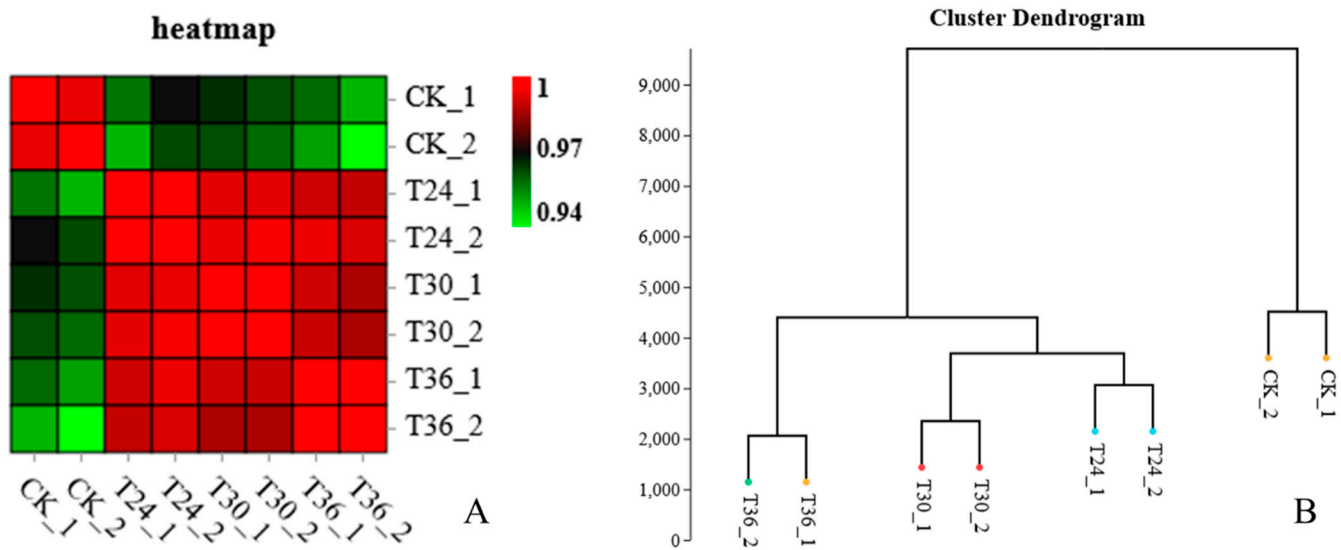

**Figure S1.** General transcription patterns of all samples. (A). Pearson correlation between controlled and treated nematodes. (B). Clustering of the biological duplicates for each RNA sequencing condition reveals conserved alignment between replicates.

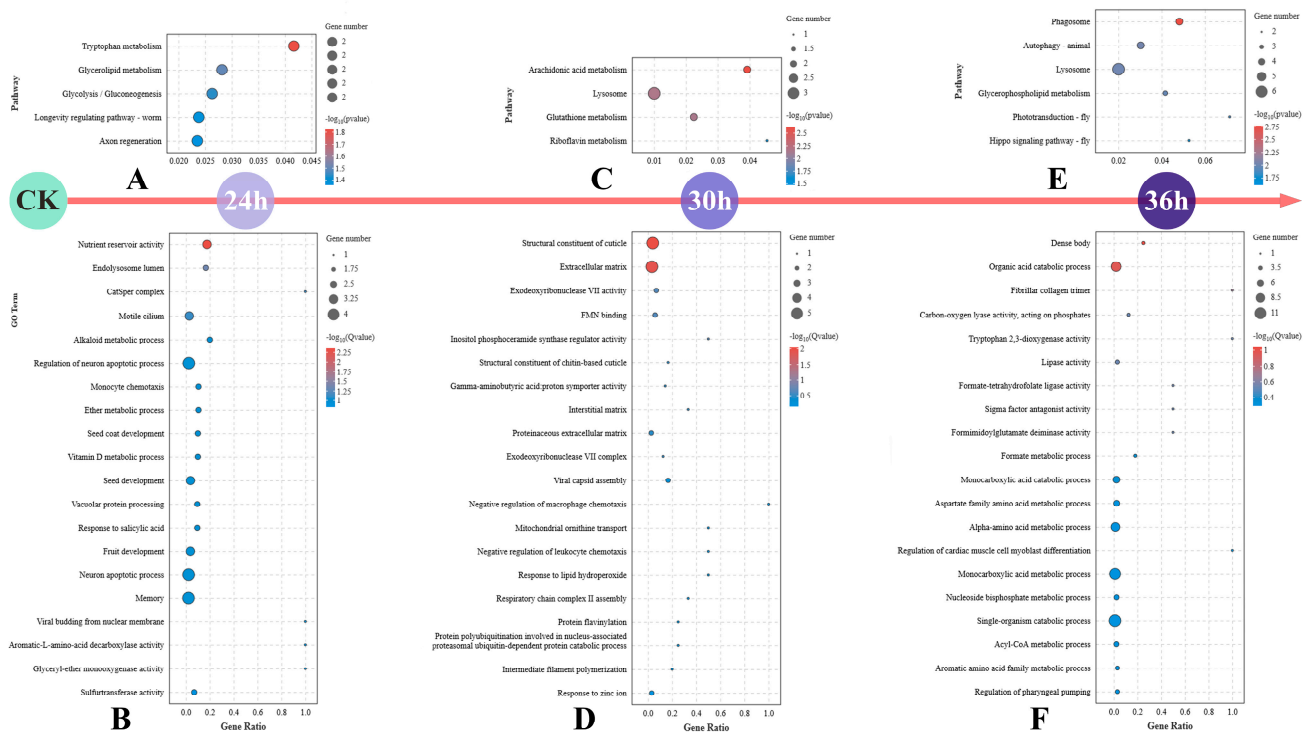

**Figure S2.** Up-regulated DEGs were identical when PWNs were exposed to *A. robusta*. Up-regulated DEGs were identical when PWNs were exposed to *A. robusta* for 24 h by KEGG (A) and GO analysis; (B) Up-regulated DEGs were identical when PWNs were exposed to *A. robusta* for 30 h by KEGG (C) and GO analysis (D); Up-regulated DEGs were identical when PWNs were exposed to *A. robusta* for 36 h by KEGG (E) and GO analysis (F).
